# Supplementary material for: Photoluminescent supramolecular hyperbranched polymer without conventional chromophores based on inclusion complexation
Source: Royal Society of Chemistry journal article supplement (doi:10.1039/c4cc02880e), 2014-05-23
Supplement: c4cc02880e1.pdf [file c4cc02880e1.pdf]

## Electronic Supplementary Information

### Photoluminescent Supramolecular Hyperbranched Polymer without Conventional Chromophores Based on Inclusion Complexation

Wenyu Li, Jiale Qu, Jianwei Du, Kefeng Ren, Youxiang Wang\*, Jingzhi Sun, QiaolingHu

MOE key Laboratory of Macromolecular Synthesis and Functionalization,  
Department of Polymer Science and Engineering, Zhejiang University, Hangzhou  
310027, P. R. China. Tel. /fax: +86 571 87953729; E-mail address:  
yx\_wang@zju.edu.cn

#### *Experimental and Methods*

**Materials.**  $\alpha$ -Cyclodextrin ( $\alpha$ -CD, 99%, AR), N, N'-carbonyldiimidazole (CDI), and diethylenetriamine (DTA) were purchased from Aladdin (Shanghai, China). SuperDry dimethyl sulfoxide (DMSO) was obtained from J&K Chemical. Distilled water was used for preparation of aqueous solutions. Other organic solvents were all analytical reagents and used as received.

**Synthesis of monomers 1.** The monomers **1** were prepared by functionalized CD and DTA using CDI as cross-linker according to the previous report with some modifications.<sup>1-3</sup> Briefly,  $\alpha$ -CD (0.973g, 1 mmol) was dissolved in 20 mL dry DMSO and CDI (1.297g, 8mmol) was added to the solution. After stirring for 3 h under nitrogen atmosphere, the mixture was slowly dropwise added to large excess of DTA within 2 h. After stirring for 16 h, the product **1a** was precipitated by ether/acetone (1:9, v/v). Then the precipitate was washed with ether/acetone, dissolved in DMSO, precipitated and washed by ether/acetone repeatedly. Finally, the product was dried in vacuo at room temperature. The monomers **1b** and **1c** were synthesized in a similar manner by adjusting feed ratio of  $\alpha$ -CD and CDI at 1:6 and 1:4, respectively.

**Formation of supramolecular hyperbranched polymers:** monomer **1** (0.2 g) was dissolved in 1 mL of DMSO. Then the solution was poured into 4 mL of acetone, stirred for 3 days, isolated by centrifugation, washed four times by acetone and dried in vacuo at 30°C.

#### **Measurements**

**XRD and FT-IR.** X-ray diffraction measurements were performed with a powder diffractometer (X'Pert PRO, PANalytical, Netherland). FT-IR spectra were recorded on a Nicolet DX Spectrometer in the range between 4000 and 400 cm<sup>-1</sup>, with a resolution of 2 cm<sup>-1</sup> and 64 scans.

**Dynamic Light Scattering (DLS).** Sizes were measured using a Zetasizer Nano (Malvern Inst. Ltd., UK) equipped with either a four-side clear cuvette. The samples were carried out in 4 serial

measurements at 25 °C (scattering angle 173°). Sample solutions were prepared by using distilled water. Before assay, the aqueous solutions were filtered using 0.45µm filter.

**UV-Visible and Fluorescence Spectra Spectroscopy.** UV-vis absorption spectra were recorded with a Shimadzu UV-2550 spectrophotometer using a 1 cm path length quartz cuvette. Fluorescence measurements were made on a Perkin-Elmer LS55 luminescence spectrometer. The slit width of both monochromators was 7.5 nm.

**Fluorescence Microscope.** Fluorescence microscopy was performed on an Olympus IX70 microscope with three kinds of filter (WU: 330–385, WB: 460–490, and WG: 510–550 nm).

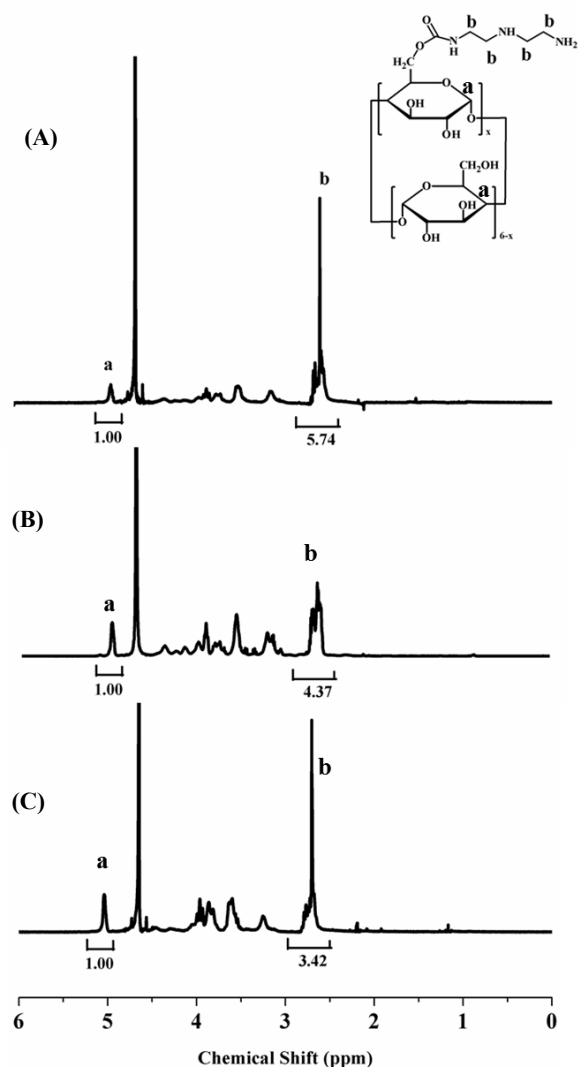

**Figure S1** <sup>1</sup>H NMR spectra of monomers **1a**(A), **1b**(B), and **1c** (C).

The chemical shift associated with the unique anomeric proton (a, O-CH-O) of glucose units of α-CD is at about 5.0 ppm. The proton peaks of DTA (-CH<sub>2</sub>CH<sub>2</sub>-) appeared at 2.5~2.90. These results suggested that Az-PEG-Gal was successfully synthesized. The DTA-grafting number was calculated by the equation (1).

$$\text{DTA-grafting number} = \frac{\text{Ib}/8}{\text{Ia}/6} \quad \text{Equation (1)}$$

Herein, *I*<sub>a</sub> and *I*<sub>b</sub> represent integration area of peak a and b, respectively. According to equation (1), it was easy to calculate the DTA-grafting number every CD. The results indicated that every CD had 4.3 (*I*<sub>a</sub>), 3.3 (*I*<sub>b</sub>), and 2.6 (*I*<sub>c</sub>) DTA molecules.

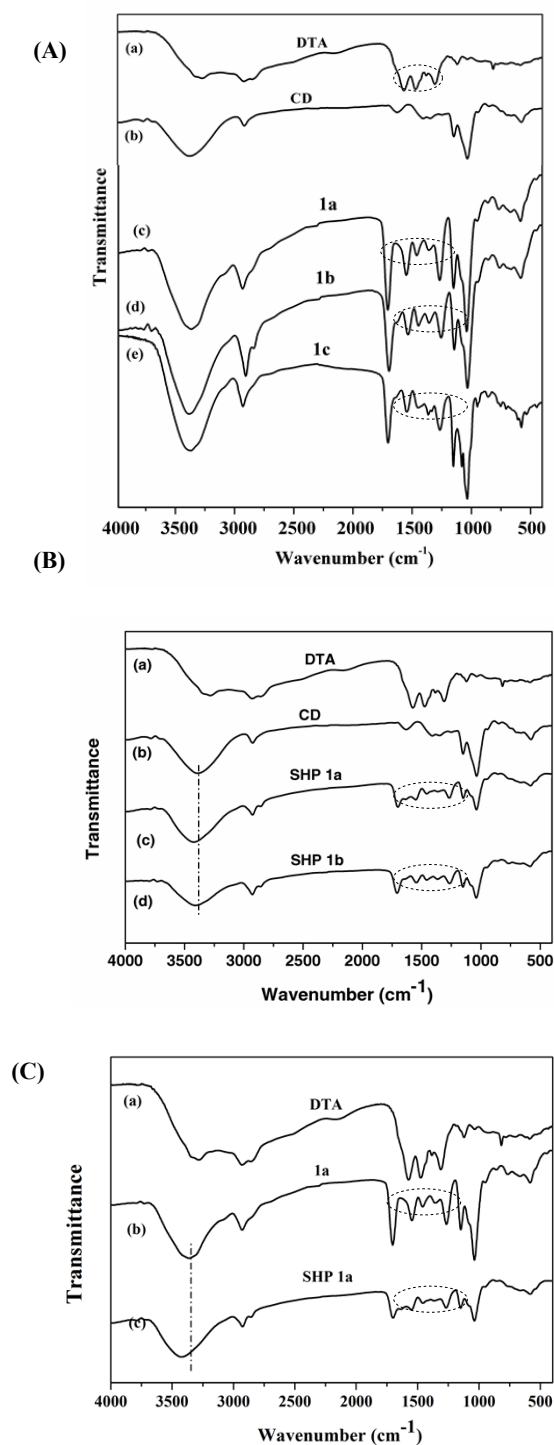

**Figure S2** A) FT-IR spectra of DTA, CD, and monomers **1** with different DTA grafting levels. B) FT-IR spectra of SHP **1a** and SHP **1b**. C) FT-IR spectra of **1 a**, and SHP **1a**.

Figure S2A shows the FTIR spectra of (a) DTA, (b)  $\alpha$ -CD, (c) **1a**, (d) **1b**, (e) **1c**. For all monomers, the typical broad peaks at 3389 cm<sup>-1</sup> was normally assigned to the O-H stretching modes for CD. They also

had several vibration models during 1700-1200  $\text{cm}^{-1}$ , which were typical vibration models for DTA. These results were consistent with  $^1\text{H}$  NMR and confirmed the successful preparation of monomers **1**.

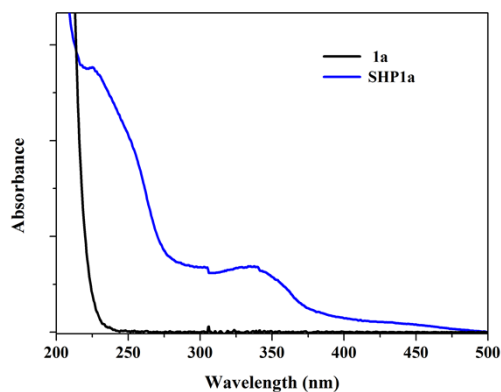

**Figure S3** UV-Vis spectra of monomer **1a** and SHP **1a**. All samples were containing 0.5 mM monomer units.

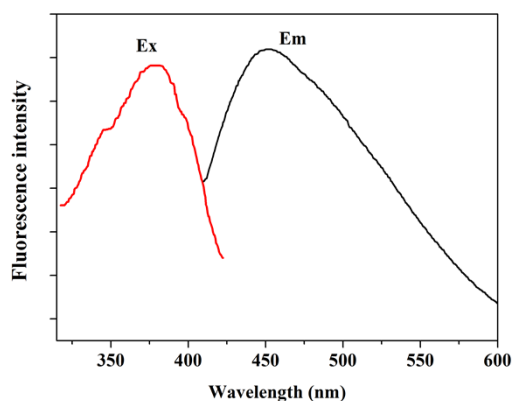

**Figure S4** Emission (Em) and excitation (Ex) spectra of 0.5 mM SHP **1a** aqueous solution.

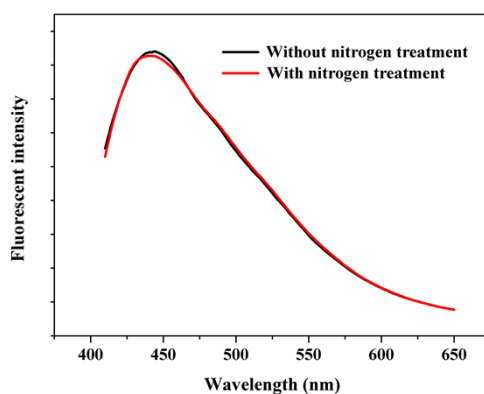

**Figure S5** Emission (Em) spectra of 0.5 mM SHP **1a** aqueous solution with or without nitrogen treatment. All samples were containing 0.5 mM monomer units.

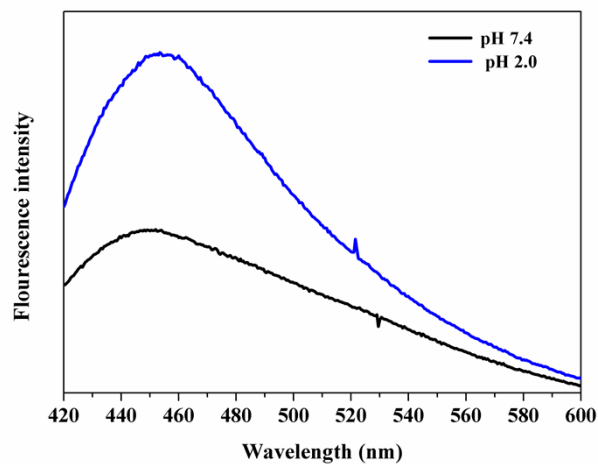

**Figure S6** Fluorescence emission spectra of different SHP1a at different pH. All samples were containing 0.5 mM monomer units.

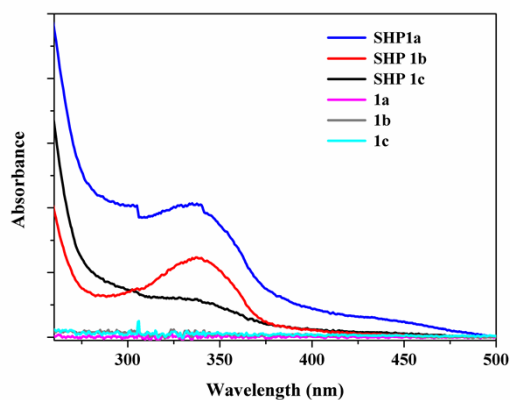

**Figure S7** UV-Vis spectra of different monomers and SHPs. All samples were containing 0.5 mM monomer units.

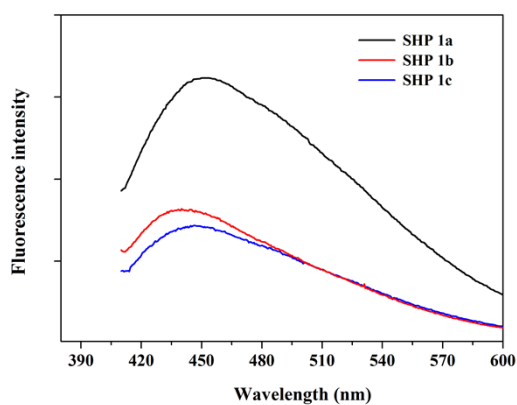

**Figure S8** Fluorescence emission spectra of different SHPs. All samples were containing 0.5 mM monomer units.

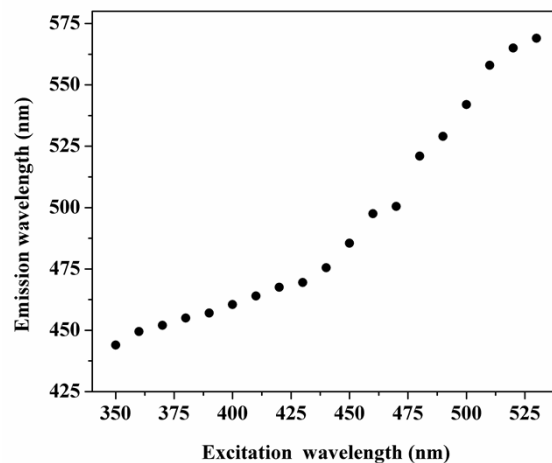

**Figure S9** Fluorescence emission wavelengths with different excitation wavelengths ranging from 350 to 530 nm by 10 nm incensement.

### References:

- (1) Srinivasachari, S.; Fichter, K. M.; Reineke, T. M. *J Am Chem Soc* **2008**, *130*, 4618.
- (2) Yang, C.; Li, H.; Goh, S. H.; Li, J. *Biomaterials* **2007**, *28*, 3245.
- (3) Ooya, T.; Choi, H. S.; Yamashita, A.; Yui, N.; Sugaya, Y.; Kano, A.; Maruyama, A.; Akita, H.; Ito, R.; Kogure, K.; Harashima, H. *J Am Chem Soc* **2006**, *128*, 3852.
